# Supplementary material for: In Vitro and In Silico Evaluation of the Efficacy and Safety of a Ghanaian Herbal Medicine for the Treatment of Onchocerciasis and African Trypanosomiasis
Source: Research Square preprint supplement (doi:10.21203/rs.3.rs-7189198/v1), 2025-08-25
Supplement: Supplementary file 1 [file f845e297cc88335bb2cb6cad.docx]

## **Supplementary Information**

***In Vitro* and *In Silico* Evaluation of the Efficacy and Safety of a Ghanaian Herbal Medicine for the Treatment of Onchocerciasis and Trypanosomiasis**

Barbara Zenabu Anibea#, Daniel Moscoh Ayine-Tora#, Theresa Manful Gwira$γ, Dorcas Osei-Safo#‡

#Department of Chemistry, University of Ghana

$West African Centre for Cell Biology of Infectious Pathogens, University of Ghana

γDepartment of Biochemistry, Cell and Molecular Biology, University of Ghana

‡Corresponding author: dosei-safo@ug.edu.gh; +233208169376

**Table of Contents**

Figure S1: 1H NMR spectrum of bis(4-methylheptyl) phthalate ……….…3

Figure S2: 13C NMR spectrum of bis(4-methylheptyl) phthalate) ……...…3

Figure S3: DEPT 135 spectrum of bis(4-methylheptyl) phthalate ………..4

Figure S4: MS of bis(4-methylheptyl) phthalate …………………………4

Figure S5: 13C NMR spectrum of ent-kaur-16-en-19-oic acid ……..……5

Figure S6: DEPT 135 spectrum of ent-kaur-16-en-19-oic acid …………5

Figure S7: 1H NMR spectrum of ent-kaur-16-en-19-oic acid ………..…6

Figure S8: 13C-NMR Spectrum of Xylopic acid………………………..6

Figure S9: 1H-NMR Spectrum of Xylopic acid……………………….7

Figure S10: 13C-NMR Spectrum of ent-kaur-16-en-15-one-19-oic acid……………7

Figure S11: 1H-NMR Spectrum of ent-kaur-16-en-15-one-19-oic acid…………….8

Figure S12: 13C-NMR spectrum of BL2……………………………………………8

Figure S13: 1H-NMR spectrum of BL2…………………………………………….9

Figure S14: 13C-NMR spectrum of BL4……………………………………………9

Figure S15: 1H-NMR spectrum of BL4…………………………………………….10

Table S1: Results of physicochemical descriptors for the isolated compounds…………10

Table S2: Definition of lead-like, drug-like and Known drug space (KDS) in terms of molecular descriptors. The values given are the maxima for each descriptor for the volumes of chemical space used………………………………………………………………………………………….11

Figure S16: Modelling against glutathione S-transferase (Onchocerciasis), Ribbon (A) and Cell phase (B) of Glutathione S-transferase………………………………………………………11

Table S3: RSMD values for heavy atoms between the co-crystallized ligand and the docked molecule…………………………………………………………………………………..…11

Table S**4**: Results of the binding score function for the ligands………………………...……11

Figure S17: Modelling against glutamate-gated chloride channel, Ribbon (A) and Cell phase (B) of Glutamate-gated chloride ion channel……………………………………………………12

Table S5: RSMD values for heavy atoms between the co-crystallized ligand and the docked molecule……………………………………………………………………………….……13

Table S6: Results of the binding score function for the ligands……………………….……13

Figure S18: Modelling against Ornithine Decarboxylase (ODC) (Trypanosomiasis), Ribbon (A) and Cell phase (B) of Ornithine decarboxylase………………………………………….14

Table S7: RSMD values for heavy atoms between the co-crystallized ligand and the docked molecule…………………………………………………………………………….……14

Table S8: Results of the binding score function for the ligands…………………….……15


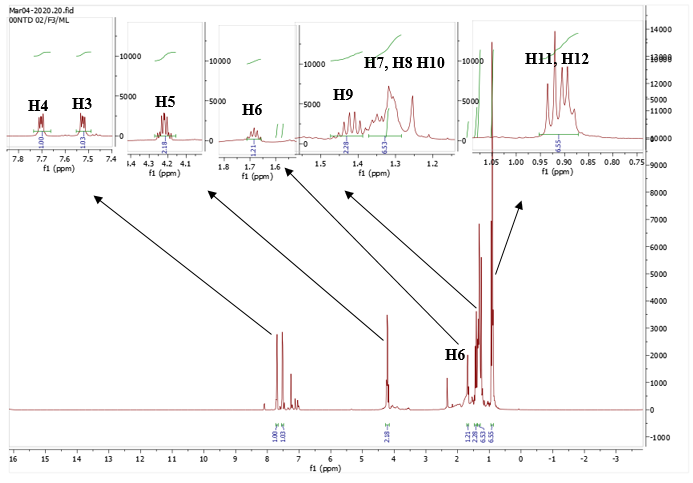


**Figure S1: 1H-NMR Spectrum of bis(4-methylheptyl) phthalate**


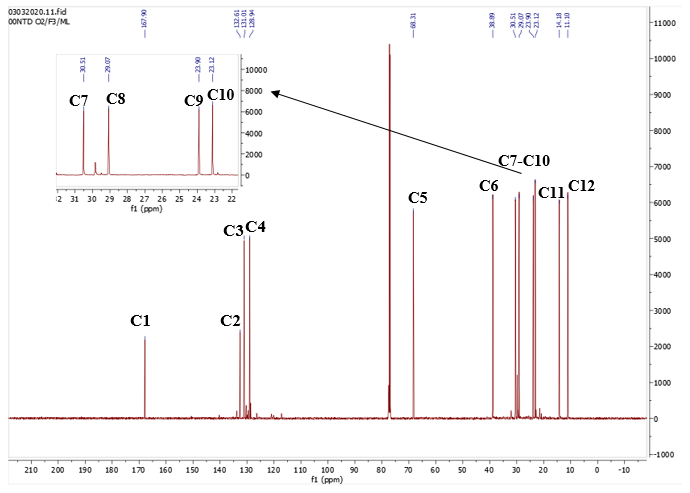


**Figure S2: 13C-NMR Spectrum of bis(4-methylheptyl) phthalate**


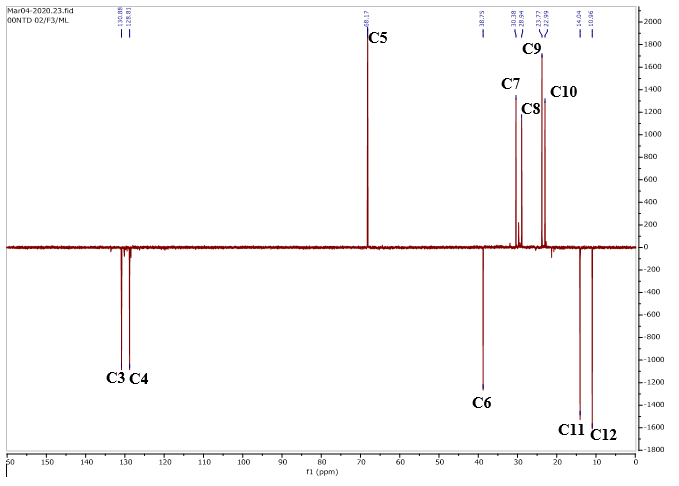


**Figure S3: DEPT 135 spectrum of** **bis(4-methylheptyl) phthalate**


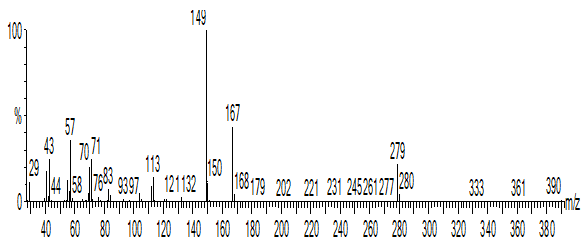


**Figure S4: MS** of **bis(4-methylheptyl) phthalate**


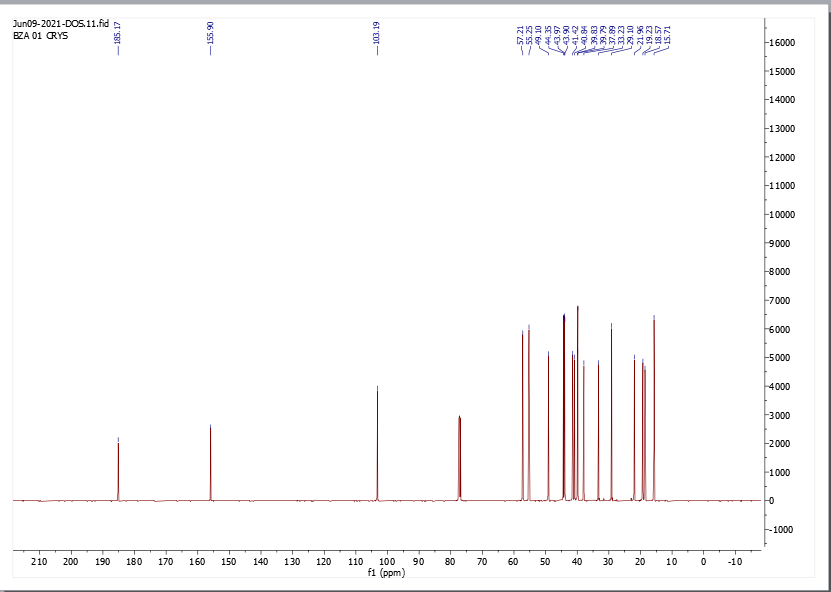


**Figure S5: 13C-NMR Spectrum of** **ent-kaur-16-en-19-oic acid**


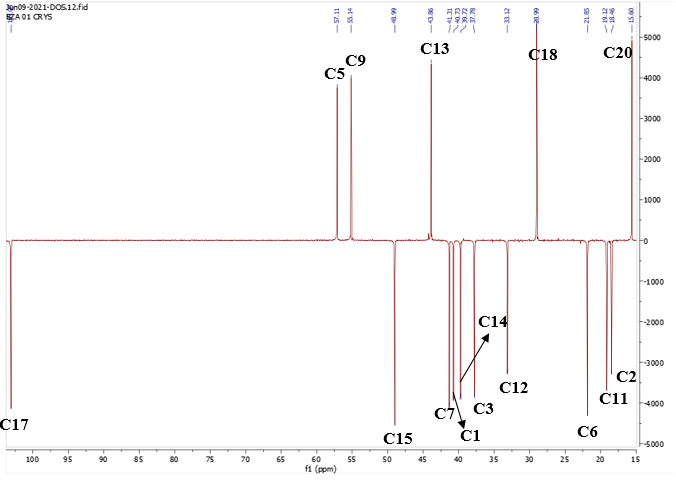


**Figure S6: DEPT 135 spectrum of ent-kaur-16-en-19-oic acid**


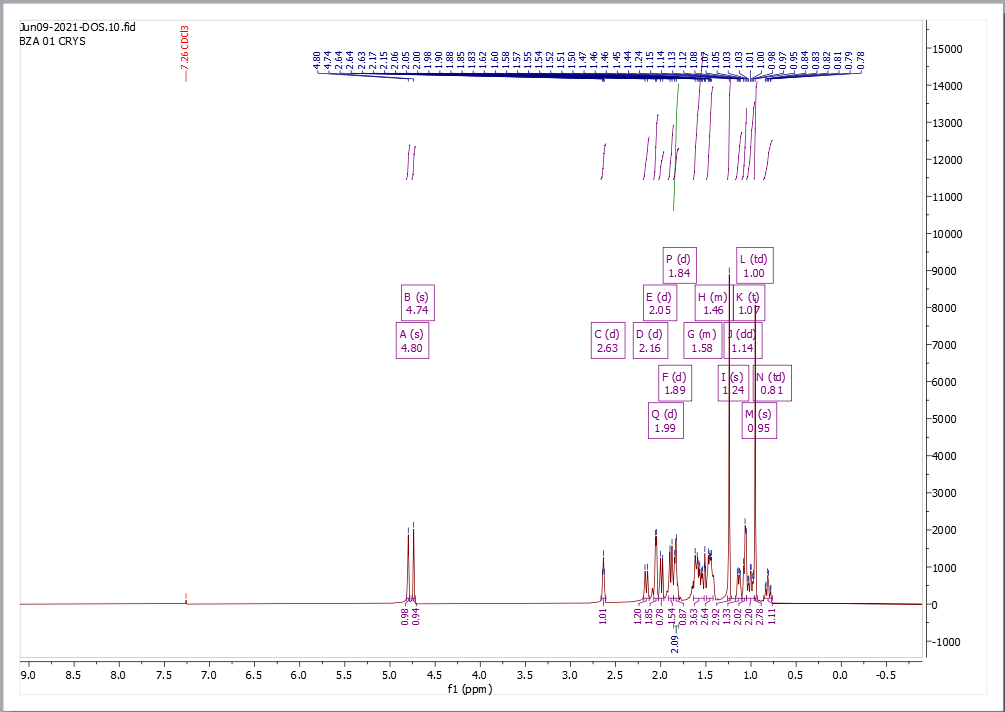


**Figure S7: 1H-NMR Spectrum of ent-kaur-16-en-19-oic acid**


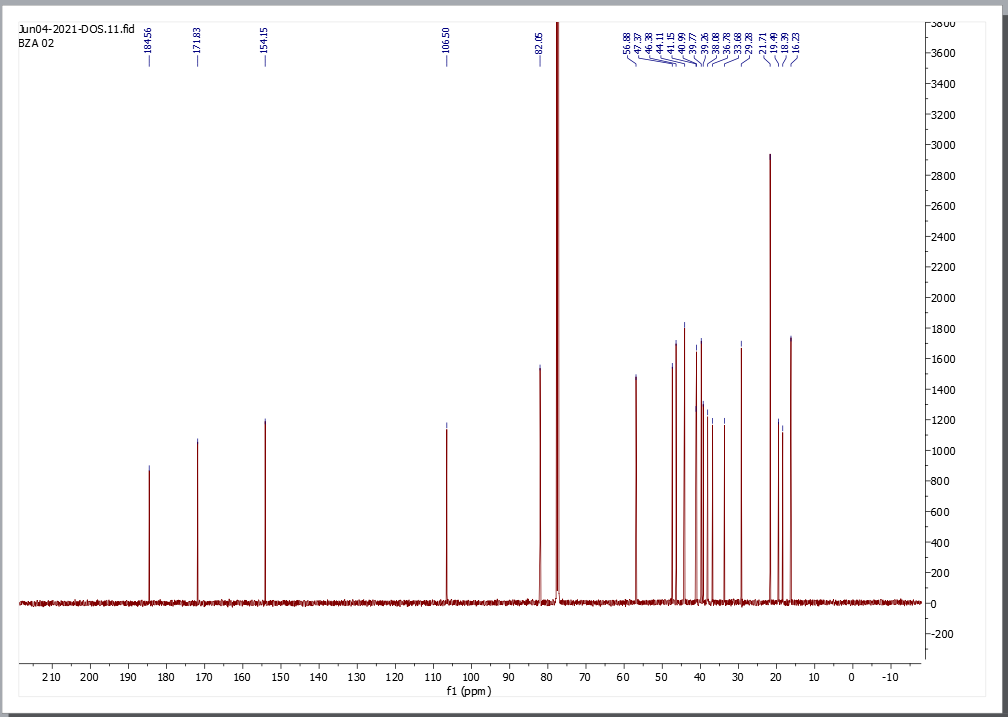


**Figure S8: 13C-NMR Spectrum of Xylopic acid**


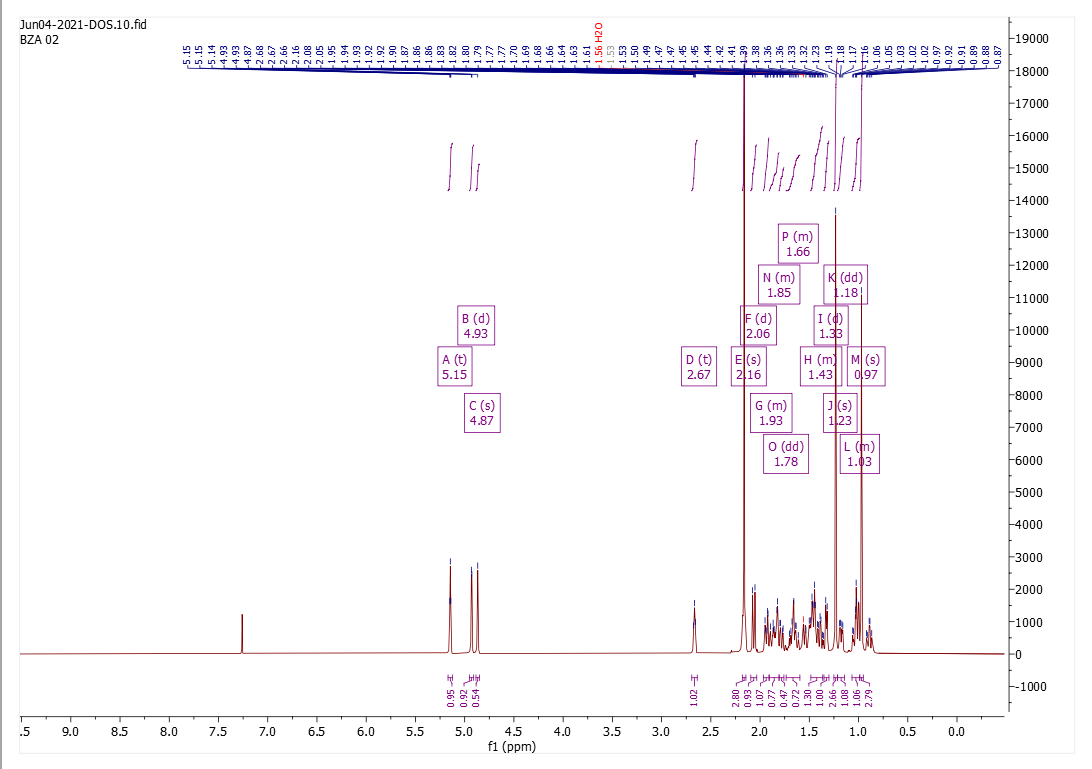


**Figure S9: 1H-NMR Spectrum of Xylopic acid**


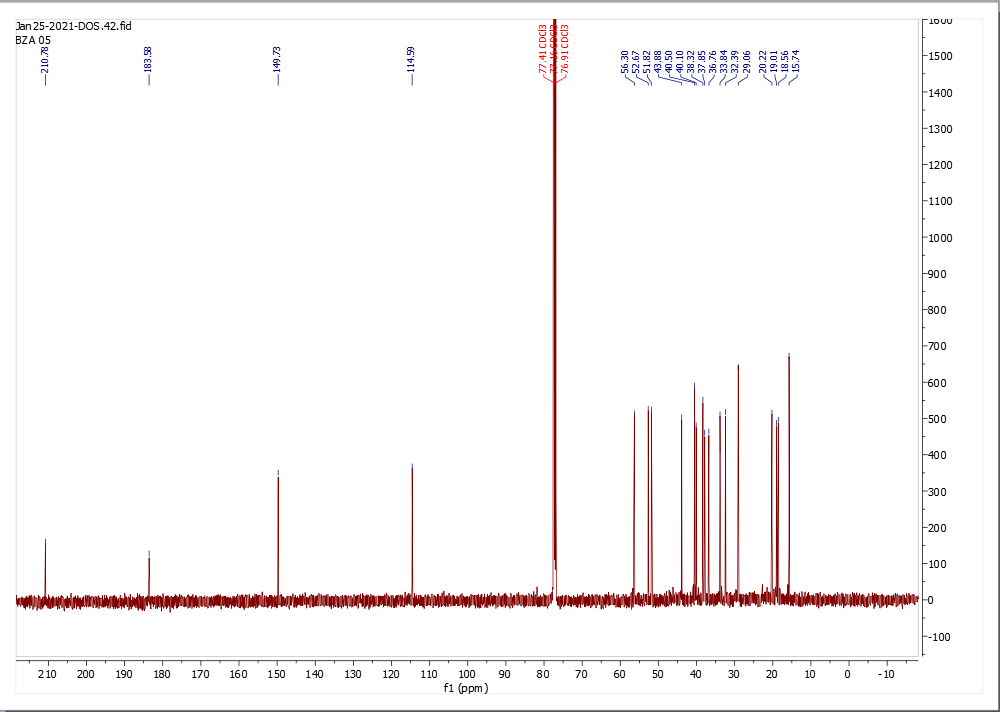


**Figure S10: 13C-NMR Spectrum of ent-kaur-16-en-15-one-19-oic acid**

~~
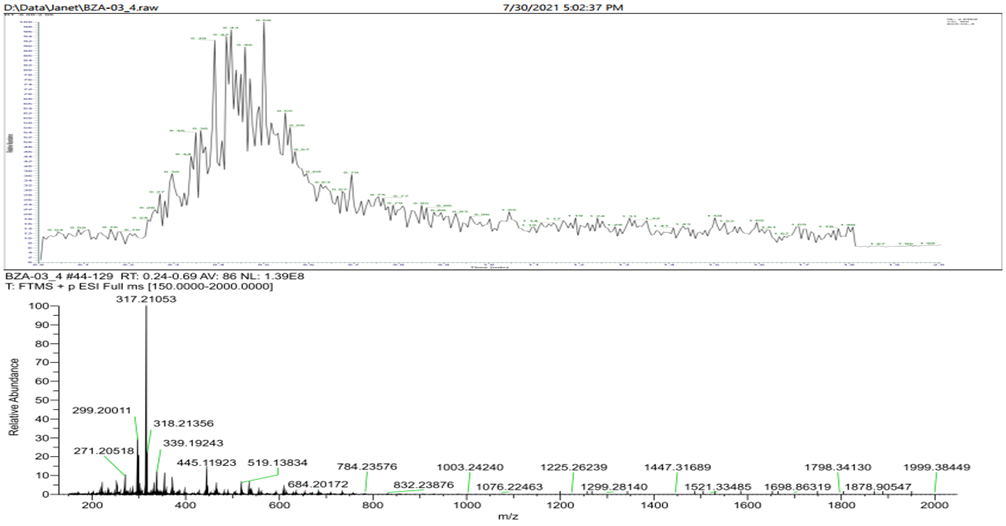
~~

**Figure S11: MS of ent-kaur-16-en-15-one-19-oic acid**


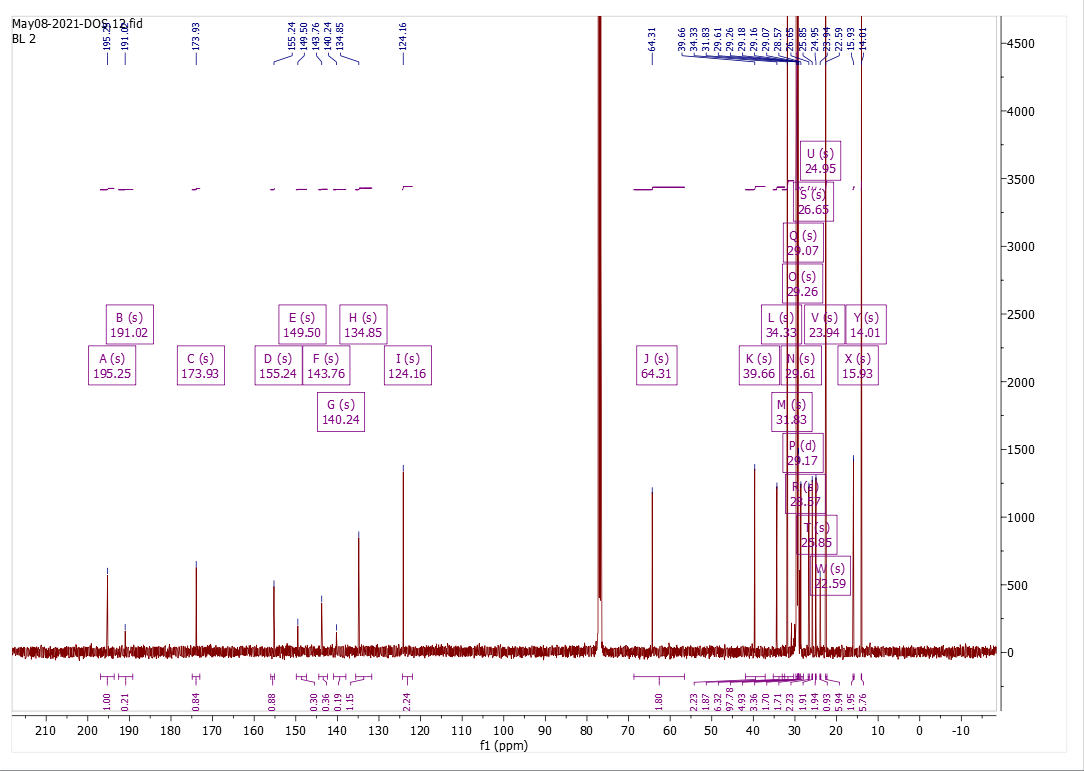


**Figure S12: 13C-NMR spectrum of BL2**

**
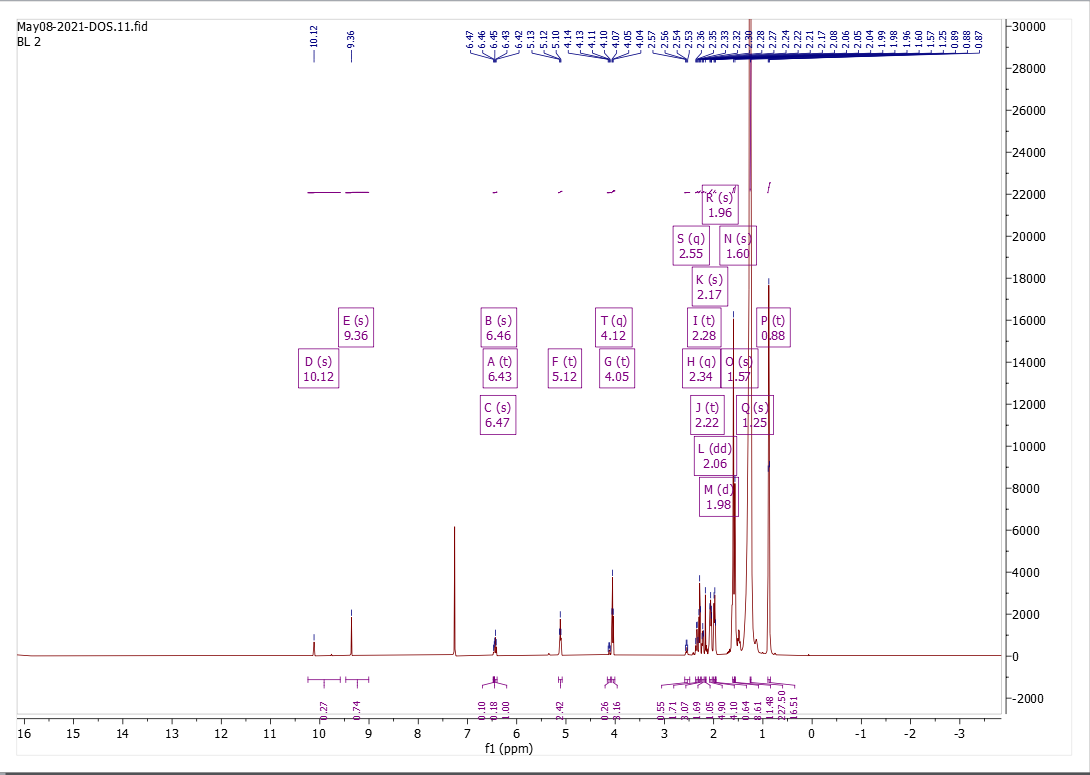
**

**Figure S13: 1H-NMR spectrum of BL2**

**
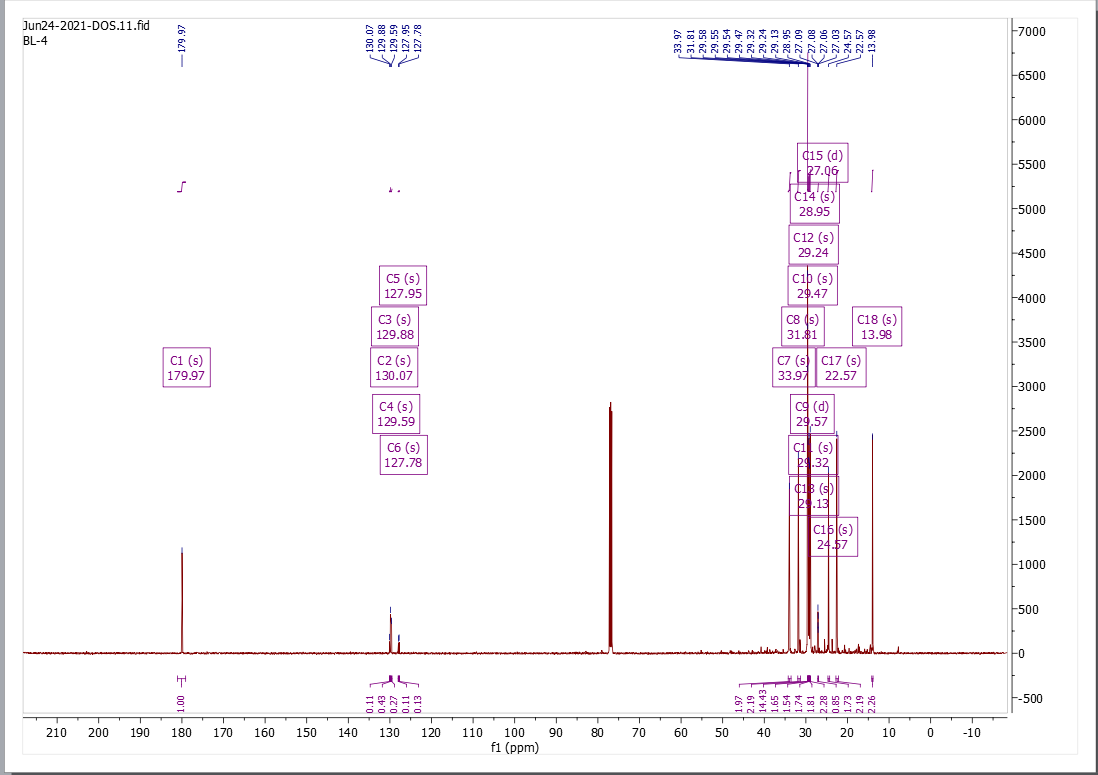
**

**Figure S14: 13C-NMR spectrum of BL4**

**
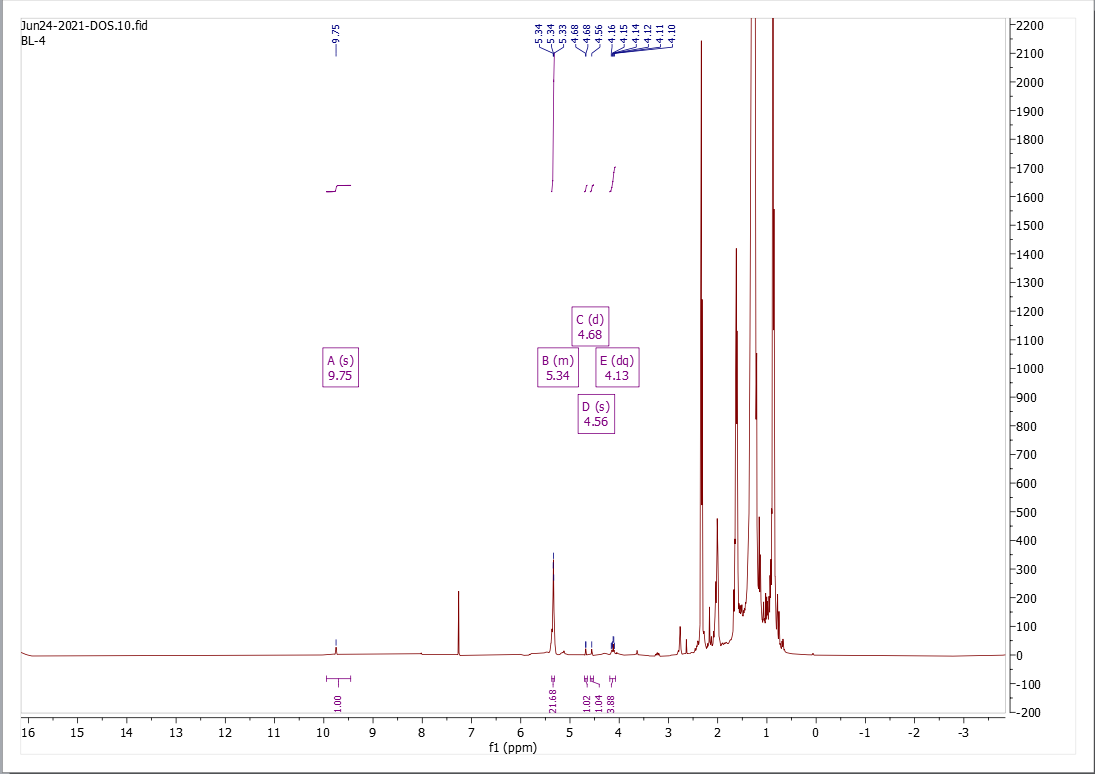
**

**Figure S15: 1H-NMR spectrum of BL4**

Table S1. Results of physicochemical descriptors for the isolated compounds.

| **Name** | **MW** | **RB** | **HA** | **HD** | **Solubility** | **log *P*** | **Lipinski** | **Ghose** | **Veber** |
| --- | --- | --- | --- | --- | --- | --- | --- | --- | --- |
| Bis(4-methylheptyl) phthalate | 390.56 | 6 | 4 | 0 | Poorly soluble | 6.44 | Yes, 1 viol | No | No |
| Kaurenoic Acid | 302.45 | 1 | 2 | 1 | Mod. soluble | 4.47 | Yes, 1 viol | Yes | Yes |
| Xylopic Acid | 360.49 | 3 | 4 | 1 | Mod. soluble | 4.05 | Yes, 0 viol | Yes | Yes |
| Ent-16-kauren-19-oic acid | 316.43 | 1 | 3 | 1 | Mod. soluble | 3.77 | Yes,0 viol | Yes | Yes |

*viol = violation, *Mod. = Moderately

Table S2. Definition of lead-like, drug-like and Known drug space (KDS) in terms of molecular descriptors. The values given are the maxima for each descriptor for the volumes of chemical space used.

|  | **Lead-like Space** | **Drug-like Space** | **Known Drug Space** |
| --- | --- | --- | --- |
| Molecular weight (g mol-1) | 300 | 500 | 800 |
| Lipophilicity (Log *P*) | 3 | 5 | 6.5 |
| Hydrogen bond donors (HD) | 3 | 5 | 7 |
| Hydrogen bond acceptors (HA) | 3 | 10 | 15 |
| Rotatable bonds (RB) | 3 | 10 | 17 |


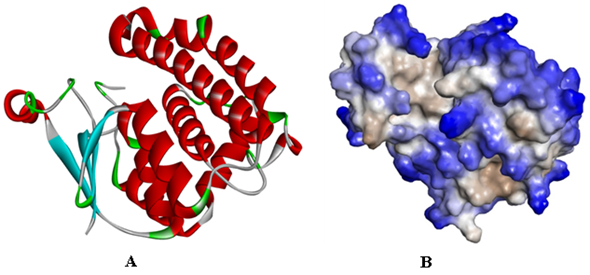


**Figure S16: Modelling against glutathione S-transferase (Onchocerciasis), Ribbon (A) and Cell phase (B) of Glutathione S-transferase**

Table S3. RSMD values for heavy atoms between the co-crystallized ligand and the docked molecule.

| **pose** | **ASP** | **PLP** | **CS** | **GS** |
| --- | --- | --- | --- | --- |
| 1 | 2.5945 | 5.0325 | 1.3231 | 2.0448 |
| 2 | 1.2473 | 8.1221 | 2.0395 | 2.2427 |
| 3 | 2.5680 | 2.2701 | 1.5045 | 1.5275 |
| Mean | **2.1366** | **5.1415** | **1.6223** | **1.9300** |

Table S4. Results of the binding score function for the ligands X = 2.570 Y = 0.814 Z = 49.968

| **Ligand** | **ASP** | **PLP** | **CS** | **GS** | |
| --- | --- | --- | --- | --- | --- |
| 2-Hydroxy-4-methylbenzoic acid | 17.68 | 39.27 | 20.91 | | 37.03 |
| 3- Carene | 15.87 | 34.74 | 21.27 | | 30.27 |
| 3,4',5-trihydroxy-6'',6''-dimethylpyrano | 39.3 | 64.41 | 30.01 | | 49.67 |
| 3,21-Dihydroxypregnan-20-one | 28.17 | 51.89 | 32.54 | | 43.7 |
| **3-O-β-sitosterol ́lβ-D-glucopyranoside** | **35.03** | **67.74** | **33.97** | | **49.07** |
| 5-feruloylquinic acid | 32.31 | 59.42 | 18.5 | | 48.25 |
| Abietic acid | 25.51 | 50.03 | 29.37 | | 39.11 |
| Apigenin BL | 35.04 | 54.8 | 28.54 | | 46.14 |
| Beta-Pinene | 14.16 | 34.38 | 20.49 | | 26.83 |
| **Bis(4-methylheptyl) phthalate** | **34.98** | **80.5** | **35.71** | | **65.19** |
| Kaurenoic acid | 23.7 | 47.38 | 26.02 | | 37.56 |
| Xylopic acid | 23.71 | 46.02 | 26.93 | | 41.98 |
| En-16-kauren-19-oic acid | 22.4 | 45.36 | 24.37 | | 39.75 |
| Cassiaoccidentalin | -2.28 | -2.01 | -20.43 | | 0 |
| Doxycycline | 37.01 | 56.07 | 23 | | 52.04 |
| Eucalyptol | 15.86 | 33.16 | 21.84 | | 25.54 |
| Farobin B | 39.26 | 67.37 | 20.8 | | 51.43 |
| Farobin A | -37.03 | 0.14 | 0 | | 0 |
| Fructose | 16.01 | 45.26 | 15.17 | | 36.98 |
| Gamma-terpinene | 16.22 | 38.89 | 19.83 | | 29.4 |
| Glucose | 18.78 | 39.61 | 18.11 | | 33.15 |
| Homoorientin | 41.17 | 57.99 | 22.96 | | 52.39 |
| isotetrandrine | -9024.4 | -12517 | -12342.54 | | 0 |
| Isovitexin | 36.28 | 68.18 | 24.73 | | 55.63 |
| **Ivermectin** | **31.11** | **66.22** | **29.8** | | **34.47** |
| Kaempferol | 34.85 | 55.98 | 26.28 | | 44.79 |
| Lupeol | 25.6 | 54.01 | 32.27 | | 46.14 |
| Luteolin | 36.67 | 56.4 | 25.97 | | 47.63 |
| Orientin BL | 42.25 | 63.92 | 21.17 | | 61.15 |
| *Para* cymene | 17.16 | 40.08 | 19.61 | | 31.4 |
| Quercetin | 36.13 | 55.65 | 26.73 | | 47.25 |
| Trans-Pinocarveol | 15.69 | 33.36 | 20.76 | | 26.41 |
| trans-tiliroside | -547.37 | -1907.6 | -1971.39 | | 0 |
| Tricin 5-O-glucoside | 42.52 | 71.7 | 26.06 | | 57.98 |
| Tricin | 36.29 | 51.71 | 27.36 | | 48.92 |

**
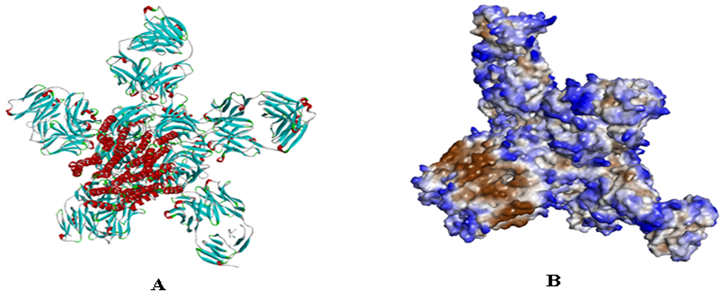
**

**Figure S17: Modelling against glutamate-gated chloride channel, Ribbon (A) and Cell phase (B) of Glutamate-gated chloride ion channel**

Table S5. RSMD values for heavy atoms between the co-crystallized ligand and the docked molecule.

| **pose** | **ASP** | **PLP** | **CS** | **GS** |
| --- | --- | --- | --- | --- |
| 1 | 3.7443 | 1.4694 | 1.0874 | 1.4094 |
| 2 | 3.7443 | 1.5464 | 1.7139 | 2.0167 |
| 3 | 2.9338 | 1.4627 | 1.4683 | 1.8703 |
| Mean | **3.4741** | **1.4928** | **1.4232** | **1.7654** |

Table S6. Results of the binding score function for the ligands. X = 12.675 Y = 95.052 Z = 24.998

| **Ligand** | **ASP** | **PLP** | **CS** | **GS** | |
| --- | --- | --- | --- | --- | --- |
| 2-Hydroxy-4-methylbenzoic acid | 16.6 | 45.15 | 22.83 | | 31.96 |
| 3- Carene | 12.5 | 35.78 | 20.61 | | 30.92 |
| 3,4',5-trihydroxy-6'',6''-dimethylpyrano | 30.43 | 65.25 | 30.85 | | 48.67 |
| 3,21-Dihydroxypregnan-20-one | 22.4 | 65.64 | 33.19 | | 38.44 |
| **3-O-β-sitosterol ́β-D-glucopyranoside** | **24.34** | **82.75** | **34.38** | | **60.47** |
| 5-feruloylquinic acid | 29.86 | 71.49 | 23.59 | | 53.19 |
| Abietic acid | 24.04 | 62.6 | 31.91 | | 48.71 |
| Apigenin BL | 28.89 | 60.94 | 26.12 | | 48.67 |
| Beta-Pinene | 11.15 | 33.68 | 19.42 | | 28.78 |
| **Bis(4-methylheptyl) phthalate** | **29.84** | **81.12** | **32.44** | | **70.51** |
| Kaurenoic acid | 15.56 | 49.31 | 29.47 | | 33.13 |
| Xylopic acid | 16.19 | 47.27 | 25.07 | | 35.78 |
| En-16-kauren-19-oic acid | 16.23 | 48.17 | 26.4 | | 36.89 |
| Cassiaoccidentalin | -72.67 | -94.43 | -47.15 | | 0 |
| **5-hexyl Glutathione** | **38.41** | **95.74** | **41.1** | | **83.81** |
| Doxycycline | 32.38 | 82.28 | 20.11 | | 70.06 |
| Eucalyptol | 30.33 | 54.6 | 29.88 | | 51.64 |
| Farobin B | 28.42 | 57.8 | 24.5 | | 45.41 |
| Farobin A | 11.61 | 32.97 | 22.21 | | 33.72 |
| Fructose | 34.59 | 77.71 | 20.88 | | 62.39 |
| Gamma-terpinene | -159.5 | -117.98 | -91.07 | | 0 |
| Glucose | 14.52 | 42.6 | 17.81 | | 37.56 |
| Homoorientin | 13.79 | 36.18 | 18.02 | | 31.38 |
| isotetrandrine | 16.97 | 47.71 | 21.62 | | 39.12 |
| Isovitexin | 33.13 | 55.94 | 21.75 | | 55.02 |
| Kaempferol | 33.47 | 59.36 | 26.1 | | 55.13 |
| Lupeol | 28.95 | 79.76 | 33.9 | | 45.39 |
| Luteolin | 28.59 | 56.34 | 26.02 | | 48.16 |
| Orientin BL | 15.07 | 51.88 | 32.51 | | 21.42 |
| Para-Cymene | 30.1 | 57.73 | 27.6 | | 49.86 |
| Quercetin | 29.57 | 66.36 | 19.58 | | 52.37 |
| Trans-Pinocarveol | 14.87 | 36.94 | 18.13 | | 31.21 |
| trans-tiliroside | 30.56 | 57.93 | 26.81 | | 49.06 |
| Tricin 5-O-glucoside | 12.43 | 36.88 | 20.31 | | 33.58 |
| Tricin | -561.36 | -1907.89 | -1980.08 | | 0 |

**
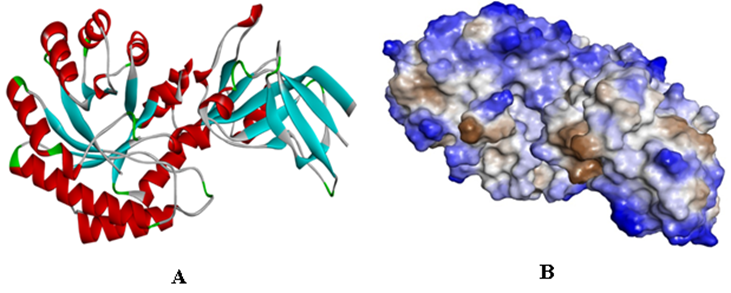
**

**Figure S18: Modelling against Ornithine Decarboxylase (ODC) (Trypanosomiasis), Ribbon (A) and Cell phase (B) of Ornithine decarboxylase**

Table S7. RSMD values for heavy atoms between the co-crystallized ligand and the docked molecule.

| **pose** | **ASP** | **PLP** | **CS** | **GS** |
| --- | --- | --- | --- | --- |
| 1 | 0.2397 | 2.1389 | 6.2047 | 0.4523 |
| 2 | 0.5307 | 0.4928 | 6.1801 | 0.5147 |
| 3 | 0.6624 | 2.1559 | 6.4241 | 0.9416 |
| Mean | **0.4776** | **1.595867** | **6.269633** | **0.6362** |

Table S8. Results of the binding score function for the ligands, X = 26.206 Y = -15.614 Z = 3.8

| **Ligand** | **ASP** | **PLP** | **CS** | **GS** |
| --- | --- | --- | --- | --- |
| 2-Hydroxy-4-methylbenzoic acid | 21.57 | 42.02 | 21.32 | 41.71 |
| 3- Carene | 12.99 | 32.19 | 19.31 | 32.51 |
| 3,4',5-trihydroxy-6'',6''-dimethylpyrano | **35.16** | **60.32** | **26.34** | **54.07** |
| 3,21-Dihydroxypregnan-20-one | 22.34 | 53.49 | 25.62 | 38.75 |
| **3-O-β-sitosterol ́β-D-glucopyranoside** | 30.82 | 65.8 | 25.8 | 52.83 |
| 5-feruloylquinic acid | 31.54 | 58.67 | 21.01 | 40.67 |
| Abietic acid | 22.98 | 39.65 | 24.06 | 31.04 |
| Apigenin BL | 32.09 | 53.25 | 25.59 | 58.22 |
| Beta-Pinene | 11.06 | 32.84 | 18.39 | 28.83 |
| **Bis(4-methylheptyl) phthalate** | **31.09** | **69.99** | **28.34** | **66.41** |
| Kaurenoic acid | 22.43 | 51.33 | 26.66 | 34.96 |
| Xylopic acid | 22.37 | 44.07 | 22.3 | 40.04 |
| En-16-kauren-19-oic acid | 21.39 | 48.6 | 24.89 | 33.04 |
| Cassiaoccidentalin | -6.97 | 1.1 | 0 | 0 |
| **Pyridoxal-5́-phosphate** | **32.66** | **51.68** | **17.92** | **59.59** |
| **Doxycycline** | **31.04** | **51.06** | **29.53** | **56.27** |
| Eucalyptol | 33.34 | 53.41 | 22.58 | 51.66 |
| Farobin B | 12.85 | 31.65 | 19.33 | 26.6 |
| Farobin A | 33.06 | 61.23 | 15.09 | 60.71 |
| Fructose | -248.49 | -424.96 | -163.07 | 0 |
| Gamma-terpinene | 16.64 | 39.95 | 17.3 | 44.02 |
| Glucose | 13.9 | 35.54 | 17.07 | 34.87 |
| Homoorientin | 19.96 | 46.27 | 17.3 | 44.46 |
| isotetrandrine | 37.78 | 64.64 | 18.89 | 59.08 |
| Isovitexin | -10995.2 | -13399.1 | -12340.01 | 0 |
| Kaempferol | 31.28 | 52.15 | 24.55 | 48.85 |
| Lupeol | 23.49 | 49.09 | 30.2 | 44.9 |
| Luteolin | 33.4 | 53.74 | 24.87 | 56.13 |
| Orientin BL | **36.18** | **64.31** | **19.71** | **64.74** |
| *Para* cymene | 14.34 | 35.71 | 17.68 | 34.62 |
| Quercetin | 34.35 | 58.36 | 25.37 | 55.6 |
| Trans-Pinocarveol | 11.88 | 30.93 | 18.68 | 26.21 |
| trans-tiliroside | 21.57 | 42.02 | 21.32 | 41.71 |
| Tricin 5-O-glucoside | 12.99 | 32.19 | 19.31 | 32.51 |
| Tricin | **35.16** | **60.32** | **26.34** | **54.07** |
